# Supplementary material for: Evaluation of Rapid Lateral-Flow Tests Directed against the SARS-CoV-2 Nucleoprotein Using Viral Suspensions Belonging to Different Lineages of SARS-CoV-2
Source: MDPI journal article supplement (doi:10.3390/v14122628), 2022-11-25
Supplement: s1 [file s1]

**Supplementary Table S1.** Series five-fold dilutions of different strains belonging to 7 strains of SARS-CoV-2 tested by 4 rapid lateral-flow tests (see main text) and a true quantitative RT-PCR test. Regarding the latter test, the last right columns illustrate the correspondence between the CT value and the actual viral load.

| Strain lineage | Biospeedia         | BD       | Abbott        | AAZ                | Nucleocapsid gene amplification (C <sub>T</sub> value) | Viral load (copies/200µl of viral culture) |
|----------------|--------------------|----------|---------------|--------------------|--------------------------------------------------------|--------------------------------------------|
| 19A            | Positive           | Positive | Positive      | Positive           | 20.69                                                  | 6.45                                       |
|                | Positive           | Positive | Positive      | Positive           | 23.32                                                  | 5.68                                       |
|                | Positive           | Positive | Positive      | Positive           | 24.65                                                  | 5.28                                       |
|                | Weak positive      | Negative | Weak positive | Weak positive      | 28.64                                                  | 4.10                                       |
|                | Negative           | Negative | Negative      | Very weak positive | 30.80                                                  | 3.46                                       |
|                | Negative           | Negative | Negative      | Negative           | 31.93                                                  | 3.13                                       |
| 20A            | Positive           | Positive | Positive      | Positive           | 21.08                                                  | 6.34                                       |
|                | Positive           | Positive | Positive      | Positive           | 23.28                                                  | 5.69                                       |
|                | Positive           | Negative | Positive      | Positive           | 25.32                                                  | 5.08                                       |
|                | Weak positive      | Negative | Weak positive | Negative           | 27.86                                                  | 4.33                                       |
|                | Negative           | Negative | Negative      | Negative           | 30.12                                                  | 3.67                                       |
|                | Negative           | Negative | Negative      | Negative           | 31.93                                                  | 3.13                                       |
| Alpha          | Positive           | Positive | Positive      | Positive           | 21.07                                                  | 6.34                                       |
|                | Positive           | Positive | Negative      | Positive           | 23.10                                                  | 5.74                                       |
|                | Positive           | Negative | Positive      | Negative           | 24.47                                                  | 5.34                                       |
|                | Weak positive      | Negative | Positive      | Negative           | 26.99                                                  | 4.59                                       |
|                | Negative           | Negative | Negative      | Negative           | 30.16                                                  | 3.65                                       |
|                | Negative           | Negative | Negative      | Negative           | 31.93                                                  | 3.13                                       |
| Beta           | Positive           | Positive | Positive      | Positive           | 23.23                                                  | 5.70                                       |
|                | Positive           | Positive | Positive      | Positive           | 25.56                                                  | 5.01                                       |
|                | Weak positive      | Negative | Weak positive | Positive           | 29.07                                                  | 3.97                                       |
|                | Negative           | Negative | Negative      | Negative           | 31.23                                                  | 3.34                                       |
|                | Negative           | Negative | Negative      | Negative           | 31.93                                                  | 3.13                                       |
|                | Negative           | Negative | Negative      | Negative           | 31.93                                                  | 3.13                                       |
| Gamma          | Positive           | Positive | Positive      | Positive           | 21.93                                                  | 6.09                                       |
|                | Positive           | Positive | Positive      | Positive           | 24.45                                                  | 5.34                                       |
|                | Weak positive      | Negative | Positive      | Weak positive      | 26.96                                                  | 4.60                                       |
|                | Very weak positive | Negative | Negative      | Negative           | 28.97                                                  | 4.00                                       |
|                | Negative           | Negative | Negative      | Negative           | 31.51                                                  | 3.25                                       |
|                | Negative           | Negative | Negative      | Negative           | 31.93                                                  | 3.13                                       |
| Delta          | Positive           | Positive | Positive      | Positive           | 19.84                                                  | 6.70                                       |
|                | Positive           | Positive | Positive      | Positive           | 22.32                                                  | 5.97                                       |
|                | Positive           | Positive | Positive      | Negative           | 24.95                                                  | 5.19                                       |
|                | Weak positive      | Negative | Weak positive | Negative           | 27.03                                                  | 4.58                                       |
|                | Negative           | Negative | Negative      | Negative           | 29.17                                                  | 3.95                                       |
|                | Negative           | Negative | Negative      | Negative           | 31.93                                                  | 3.13                                       |
| Omicron        | Positive           | Positive | Positive      | Positive           | 22.03                                                  | 6.06                                       |
|                | Positive           | Positive | Positive      | Positive           | 23.98                                                  | 5.48                                       |
|                | Weak positive      | Negative | Weak positive | Weak positive      | 26.34                                                  | 4.78                                       |
|                | Negative           | Negative | Negative      | Negative           | 28.85                                                  | 4.04                                       |
|                | Negative           | Negative | Negative      | Negative           | 31.93                                                  | 3.13                                       |
|                | Negative           | Negative | Negative      | Negative           | 31.93                                                  | 3.13                                       |
